# Supplementary material for: Synergistically enhanced alkaline hydrogen evolution reaction by coupling CoFe layered double hydroxide with NiMoO4 prepared by two-step electrodeposition
Source: Royal Society of Chemistry journal article supplement (doi:10.1039/d1nj02984c), 2021-01-01
Supplement: d1nj02984c1.pdf [file d1nj02984c1.pdf]

# Synergistically enhanced alkaline hydrogen evolution reaction by coupling CoFe layered double hydroxide with NiMoO<sub>4</sub> prepared by two-step electrodeposition

Jiankang Wang<sup>\*,1</sup>, Kui Chen<sup>1</sup>, Rong Peng, Yajing Wang, Taiping Xie<sup>\*</sup>, Quanxi Zhu, Yuan Peng,  
Qunying Yang, Songli Liu

School of materials science and engineering, Yangtze Normal University, Chongqing 408100,  
China

\* Corresponding authors.

E-mail address: wjkwjk074478@163.com (Jiankang Wang); deartaiping@163.com (Taiping Xie).

<sup>1</sup>Jiankang Wang and Kui Chen contributed equally to this work and should be considered as co-first authors.

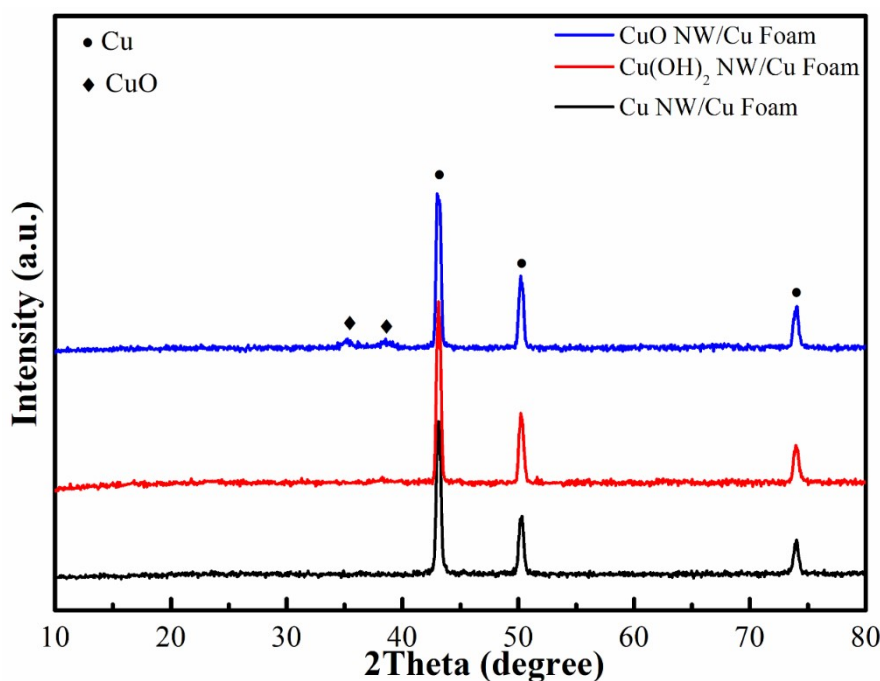

Fig. S1 XRD patterns of as-synthesized Cu(OH)<sub>2</sub> NW/Cu Foam, CuO NW/Cu Foam and Cu NW/Cu Foam

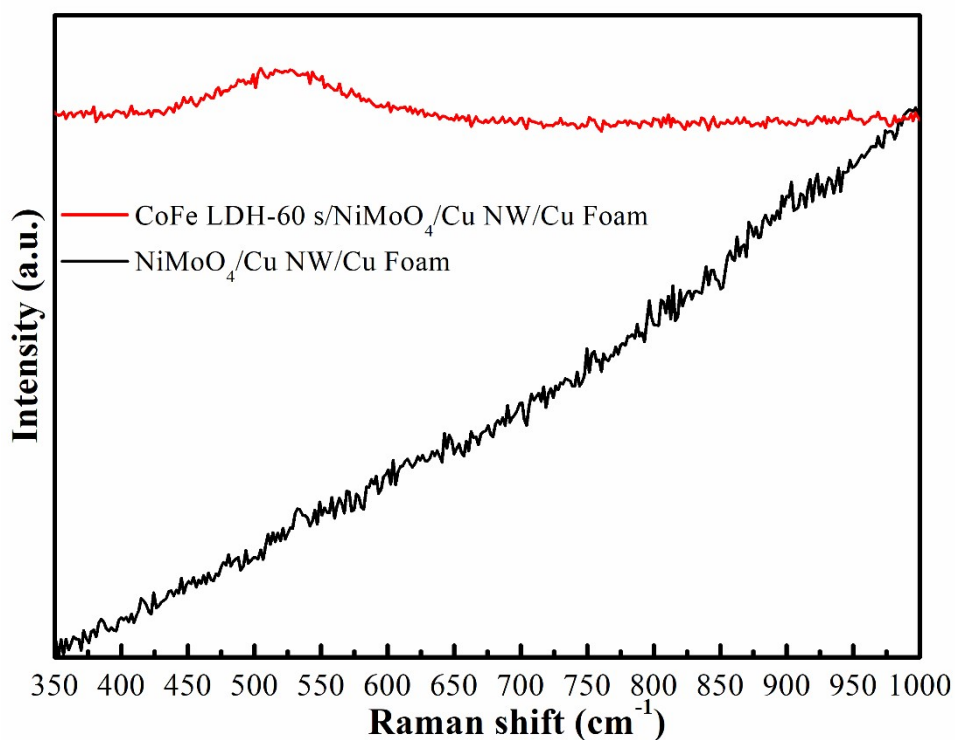

Fig. S2 Raman spectra of CoFe LDH-60 s/NiMoO<sub>4</sub>/Cu NW/Cu Foam and NiMoO<sub>4</sub>/Cu NW/Cu Foam

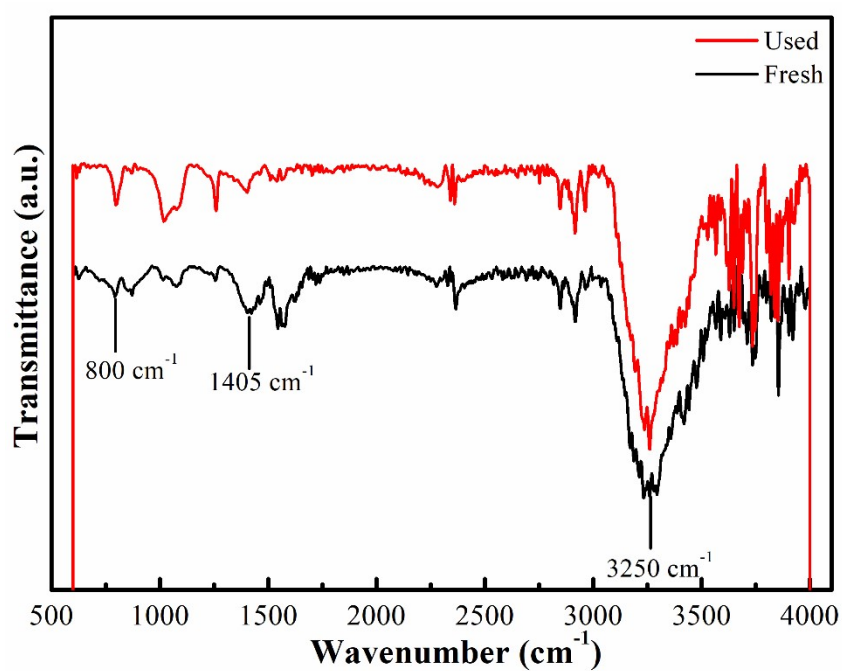

Fig. S3 ATR-FTIR of the fresh and used CoFe LDH-60 s/NiMoO<sub>4</sub>/Cu NW/Cu Foam

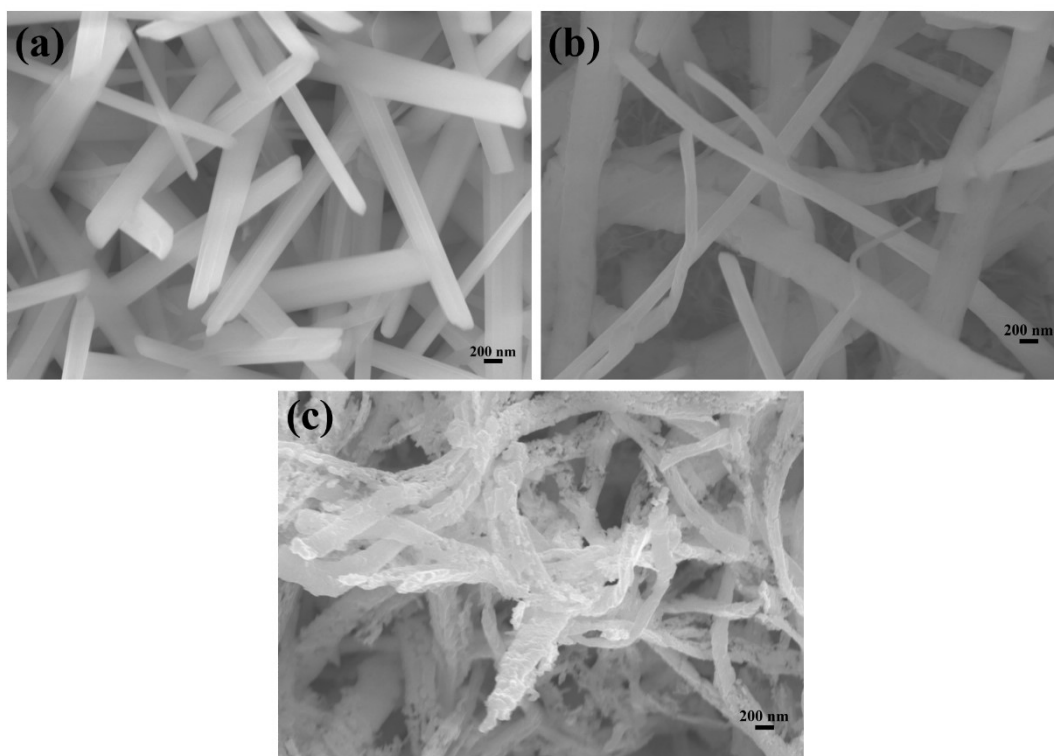

Fig. S4 SEM images of as-synthesized  $\text{Cu}(\text{OH})_2$  NW/Cu Foam (a),  $\text{CuO}$  NW/Cu Foam (b) and  $\text{Cu}$  NW/Cu Foam (c)

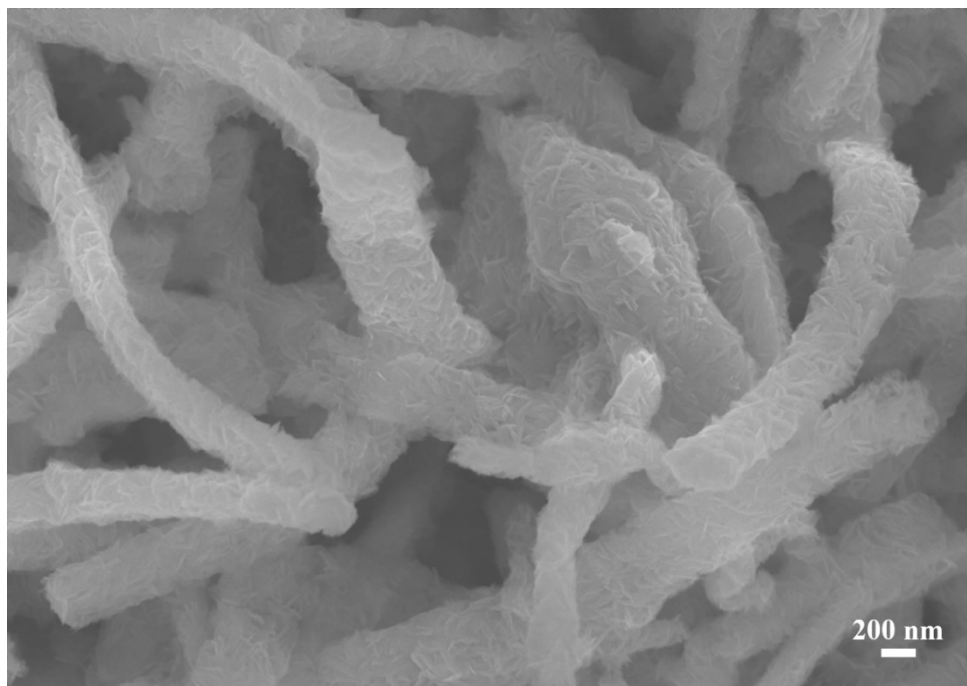

Fig. S5 SEM images of as-synthesized CoFe LDH-60 s/Cu NW/Cu Foam

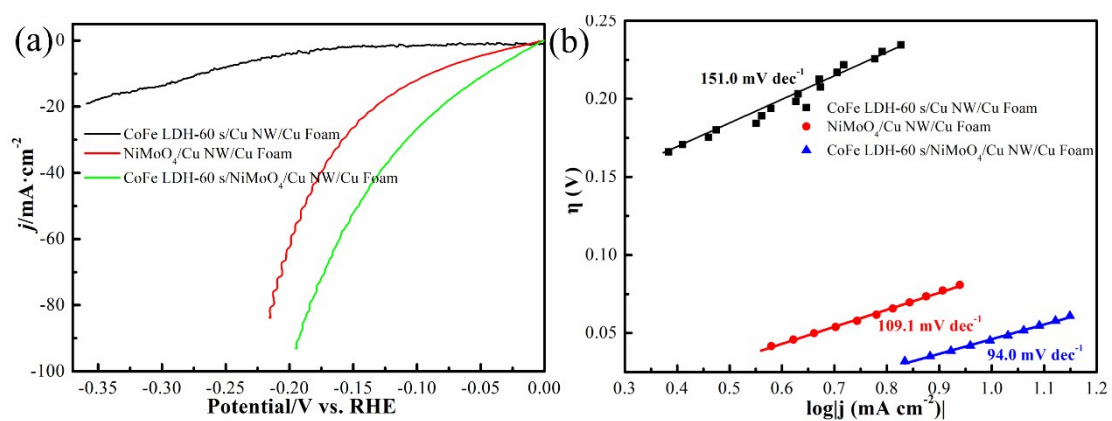

Fig. S6 Alkaline HER performance of CoFe LDH-60 s/Cu NW/Cu Foam, NiMoO<sub>4</sub>/Cu NW/Cu Foam and CoFe LDH-60 s/NiMoO<sub>4</sub>/Cu NW/Cu Foam. (a) LSV curves, (b) Tafel plots

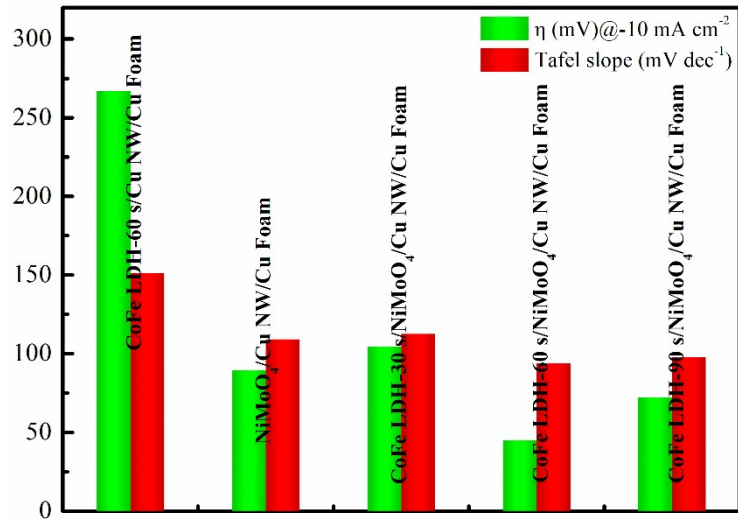

Fig. S7 Overpotential ( $\eta$ ) and Tafel slope comparison for the as-synthesized HER electrocatalysts

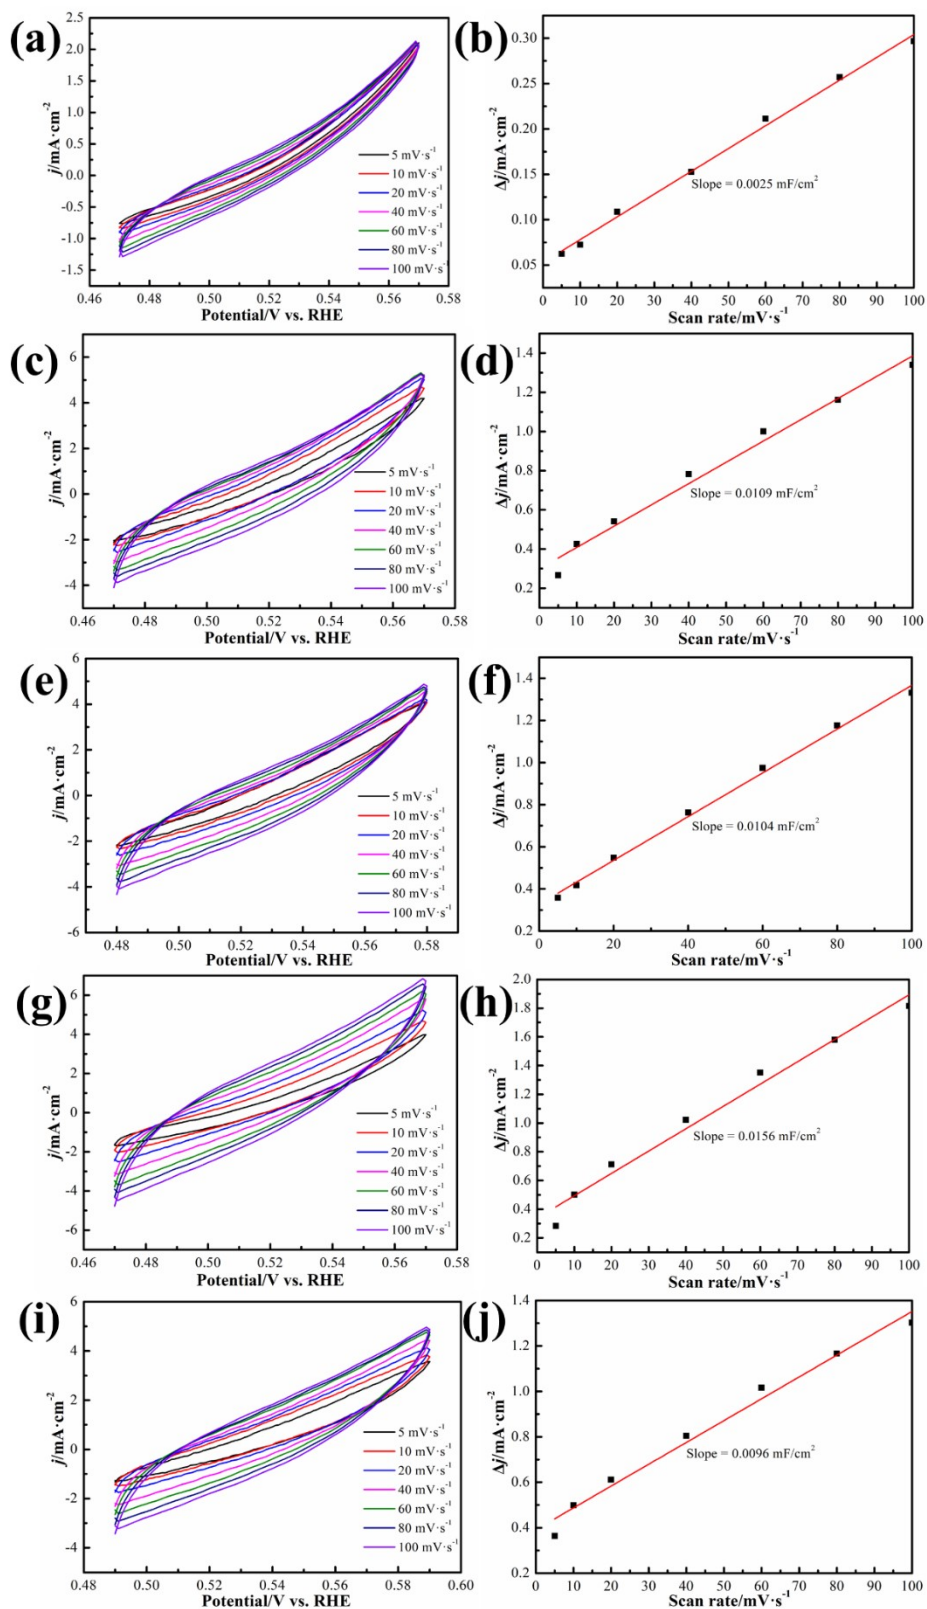

Fig. S8 CV curves obtained at different scan rates and the corresponding anodic and cathodic current density difference ( $\Delta j$ ) against scan rate plots for NiMoO<sub>4</sub>/Cu Foam (a, b), NiMoO<sub>4</sub>/Cu NW/Cu Foam (c, d), CoFe LDH-30 s/NiMoO<sub>4</sub>/Cu NW/Cu Foam (e, f), CoFe LDH-60 s/NiMoO<sub>4</sub>/Cu NW/Cu Foam (g, h) and CoFe LDH-90 s/NiMoO<sub>4</sub>/Cu NW/Cu Foam (i, j)

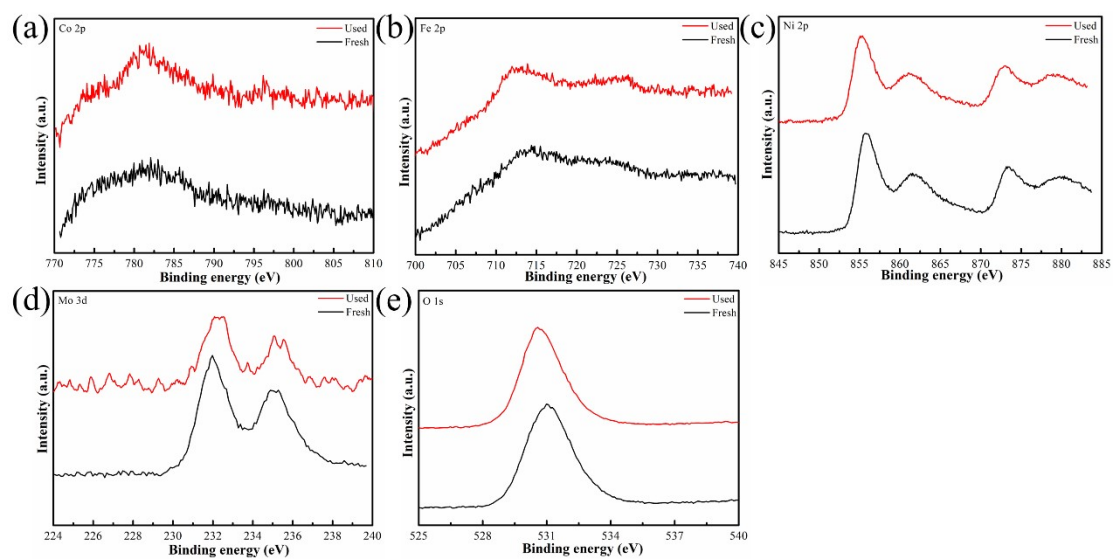

Fig. S9 High-resolution Co 2p (a), Fe 2p (b), Ni 2p (c), Mo 3d (d) and O 1s (e) XPS spectra of CoFe LDH-60 s/NiMoO<sub>4</sub>/Cu NW/Cu Foam before (Fresh) and after (Used) HER stability test

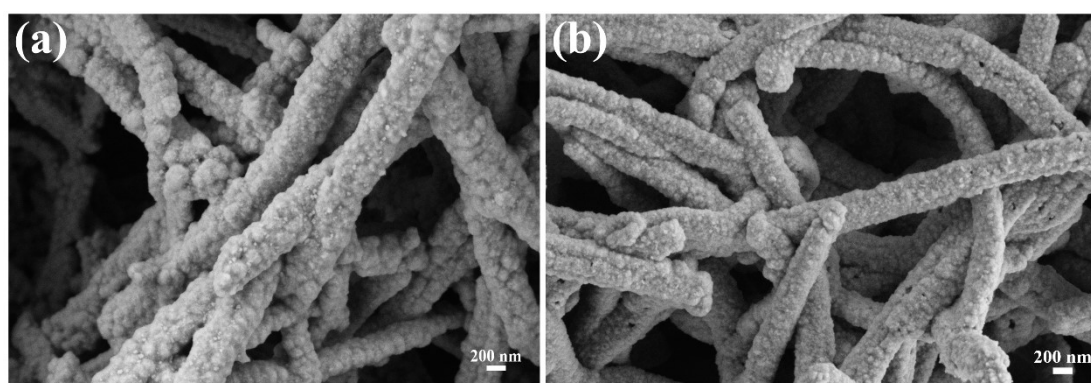

Fig. S10 SEM images of the fresh (a) and the used (b) CoFe LDH-60 s/NiMoO<sub>4</sub>/Cu NW/Cu Foam



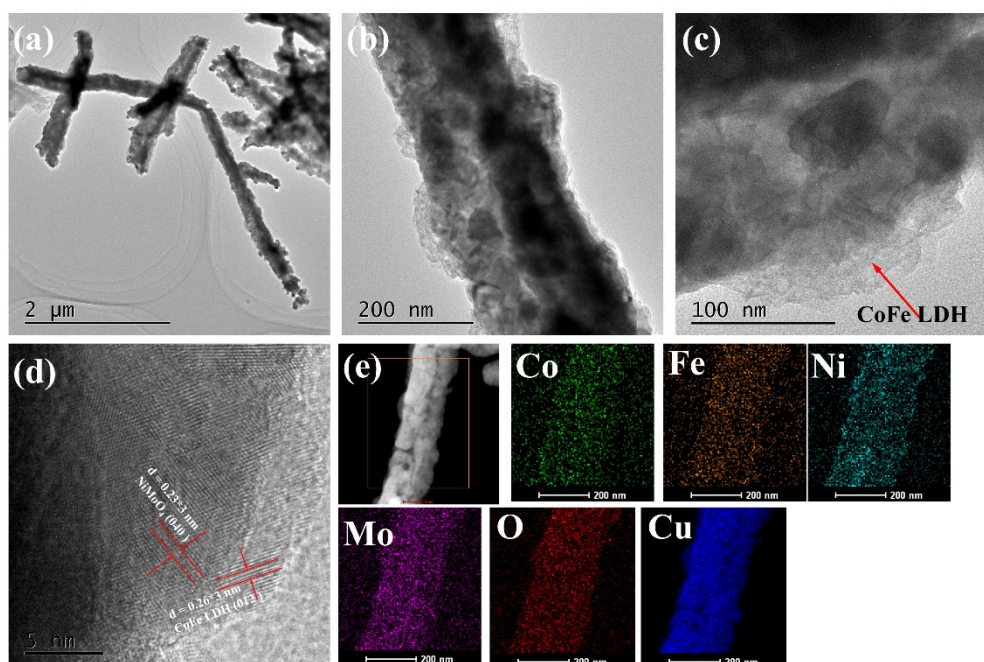

Fig. S11 TEM images (a, b and c), HRTEM image (d) and corresponding EDS mapping images (e) of the used CoFe LDH-60 s/NiMoO<sub>4</sub>/Cu NW/Cu Foam

Table S1 alkaline HER performance comparison of CoFe LDH-60 s/ NiMoO<sub>4</sub>/Cu NW/Cu Foam with the recently reported literatures

| Catalysts                                       | Electrolyte | Overpotential (mV) @ -10 mA/cm <sup>2</sup> | Tafel slope (mV/dec) | Ref.                                           |
|-------------------------------------------------|-------------|---------------------------------------------|----------------------|------------------------------------------------|
| CoFe LDH-60 s/NiMoO <sub>4</sub> /Cu NW/Cu Foam | 1.0 M KOH   | 45                                          | 94.0                 | This work                                      |
| NiMo MT/NF                                      | 1.0 M KOH   | 119                                         | 119                  | Int. J. Hydrogen Energ., 2019, 44: 24712-24718 |
| NiMoS <sub>4</sub> /Ti                          | 0.1 M KOH   | 194                                         | 97                   | J. Mater. Chem. A, 2017, 5, 16585              |
| CoFe LDH@NiFe LDH                               | 1.0 M KOH   | 240                                         | 88.88                | Appl. Catal. B- Environ., 2019, 253: 131-139   |
| NCNT-NP@NF                                      | 1.0 M KOH   | 96.1                                        | 84.8                 | Chem. Eng. J., 2021, 413: 127531               |
| Ni <sub>2(1-x)</sub> Mo <sub>2x</sub> P         | 1.0 M KOH   | 72                                          | 46.4                 | Nano Energy, 2018, 53: 492-500                 |
| MoS <sub>2</sub> @Mo <sub>2</sub> C             | 1.0 M KOH   | 129                                         | 78                   | J. Mater. Sci., 2020, 55: 16197-16210          |
